# Supplementary material for: Enhancing triplet sensitization ability of donor–acceptor dyads via intramolecular triplet energy transfer
Source: Royal Society of Chemistry journal article supplement (doi:10.1039/c9tc06337d), 2020-01-01
Supplement: c9tc06337d1.pdf [file c9tc06337d1.pdf]

## Electronic Supplementary Information for

# Enhancing triplet sensitization ability of donor-acceptor dyads via intramolecular triplet energy transfer

*Shanshan Liu<sup>a</sup>, Xiangyang Wang<sup>a</sup>, Heyuan Liu<sup>c,\*</sup>, Li Shen<sup>a</sup>, Dezhi Zhao<sup>a</sup>, and Xiyou Li<sup>b,\*</sup>*

<sup>a</sup>. College of Science, China University of Petroleum (East China), Qingdao, Shandong, 266580, China.

<sup>b</sup>. School of Materials Science and Engineering, China University of Petroleum (East China), Qingdao, Shandong, 266580, China.

<sup>c</sup>. College of New Energy, China University of Petroleum (East China), Qingdao, Shandong, 266580, China.

E-mail: xiyouli@upc.edu.cn; liuheyuan123@upc.edu.cn

## Caption of Content

**Fig. S1.** Experimental isotopic pattern for the molecular ion of PdPor-2-DPA and PdPor-9-DPA shown in the MALDI-TOF mass spectra.

**Fig. S2.**  $^1\text{H}$  NMR spectra of PdPor-2-DPA and PdPor-9-DPA in  $\text{CDCl}_3$ .

**Fig. S3.** Absorption spectra of PdPor-2-DPA, PdPor-9-DPA and mixed solution of PdTPP: DPA=1:1.

**Fig. S4.** Luminescence emission spectra of PdPor-2-DPA, PdPor-9-DPA and PdTPP.

**Fig. S5.** *fs*-TA spectra and single-wavelength dynamics of PdTPP.

**Fig. S6.** Single-wavelength dynamics of PdTPP probed at 480 nm from nanosecond TA spectra.

**Fig. S7-9.** Comparison of TA spectra and single-wavelength dynamics of PdPor-2-DPA(S7), PdPor-9-DPA(S8) PdTPP (S9) between the raw data and the fitting data obtained from the global analysis.

**Fig. S10.** Dependence of luminescence spectra on the concentration of PdPor-2-DPA or PdPor-9-DPA in toluene with 532 nm laser excitation (25 mW).

**Fig. S11.** Absorption spectrum of PdTPP; fluorescence emission spectrum of DPA; upconversion emission spectrum of PdTPP and DPA, in deaerated toluene.

**Table S1.** The orientation angle of the phthalocyanine ring determined from polarized UV-vis absorbance of the QLS films of compounds **1-2**.

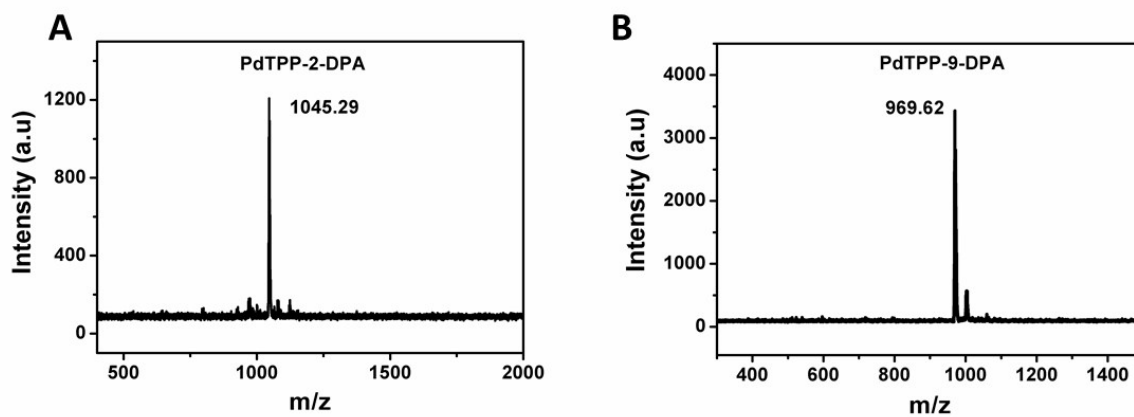

**Fig. S1.** Experimental isotopic pattern for the molecular ion of PdPor-2-DPA (A) and PdPor-9-DPA (B) shown in the MALDI-TOF mass spectra.

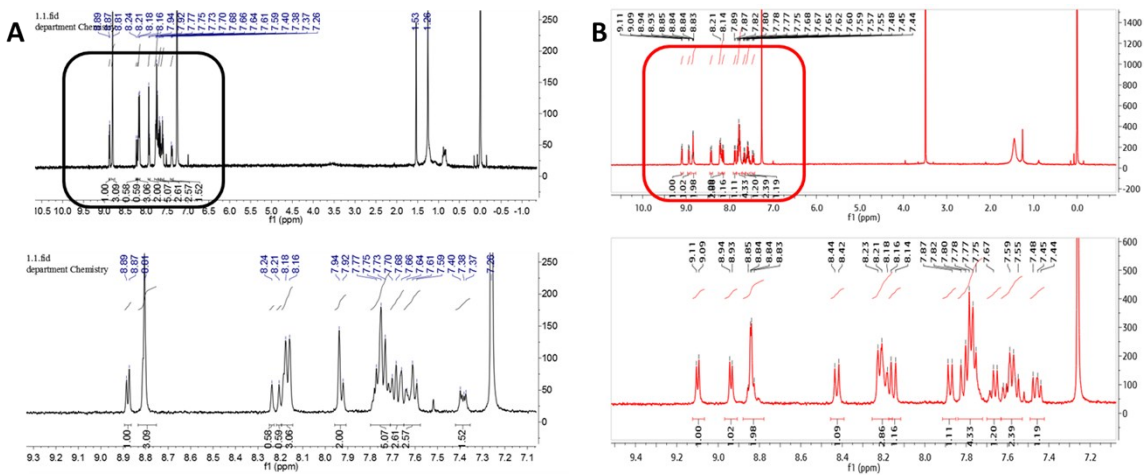

**Fig. S2.**  $^1\text{H}$  NMR spectra of PdPor-2-DPA (A) and PdPor-9-DPA (B) in  $\text{CDCl}_3$ .

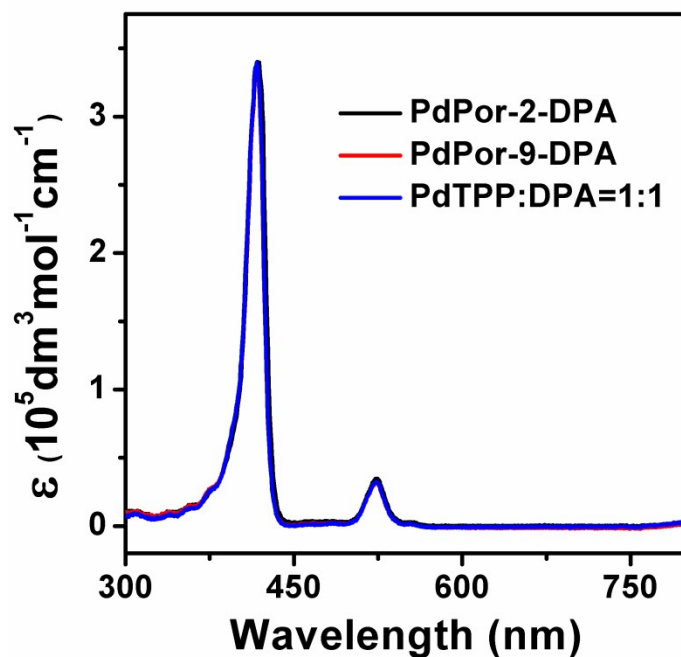

**Fig. S3.** Absorption spectra of PdPor-2-DPA, PdPor-9-DPA and mixed solution of PdTPP: DPA=1:1. PdPor-2-DPA and PdPor-9-DPA,  $c = 1.0 \times 10^{-5}$ ; in mixed solution, PdTPP and DPA,  $c = 1.0 \times 10^{-5}$  in deaerated toluene.

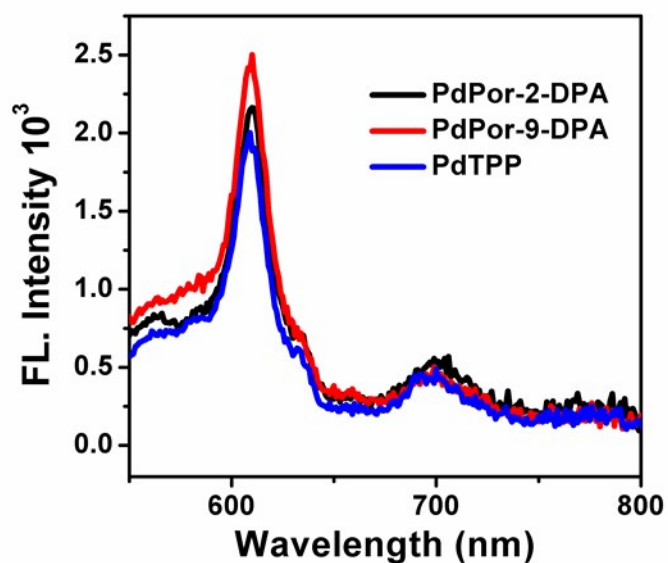

**Fig. S4.** Luminescence emission spectra of PdPor-2-DPA, PdPor-9-DPA and PdTPP.;  $\lambda_{\text{ex}} = 532$  nm,  $c = 1.0 \times 10^{-5}$  M in aerated Toluene, 293K.

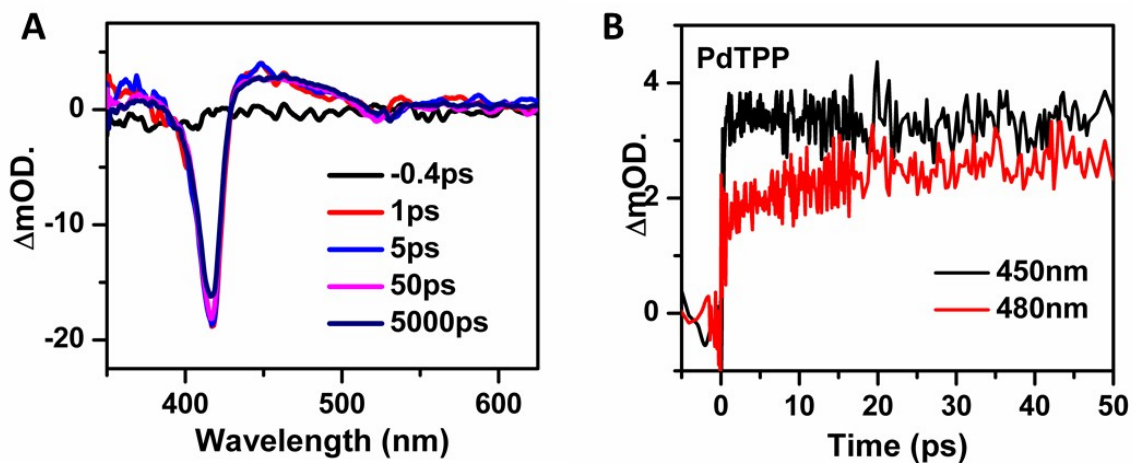

**Fig. S5.** *fs*-TA spectra (A) and single-wavelength dynamics probed at 450 and 480 nm (B) of PdTPP.  $\lambda_{\text{ex}} = 532 \text{ nm}$ ,  $c = 2.0 \times 10^{-5} \text{ M}$  in deaerated toluene, 293K.

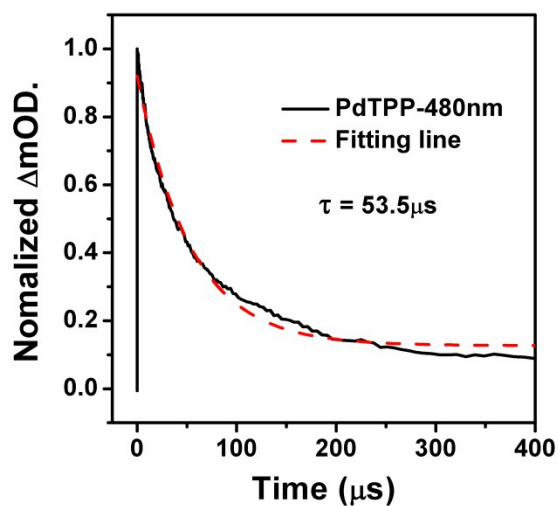

**Fig. S6.** Single-wavelength dynamics of PdTPP probed at 480 nm from nanosecond TA spectra.  $\lambda_{\text{ex}} = 532 \text{ nm}$ ,  $c = 2.0 \times 10^{-5} \text{ M}$  in deaerated toluene, 293 K.

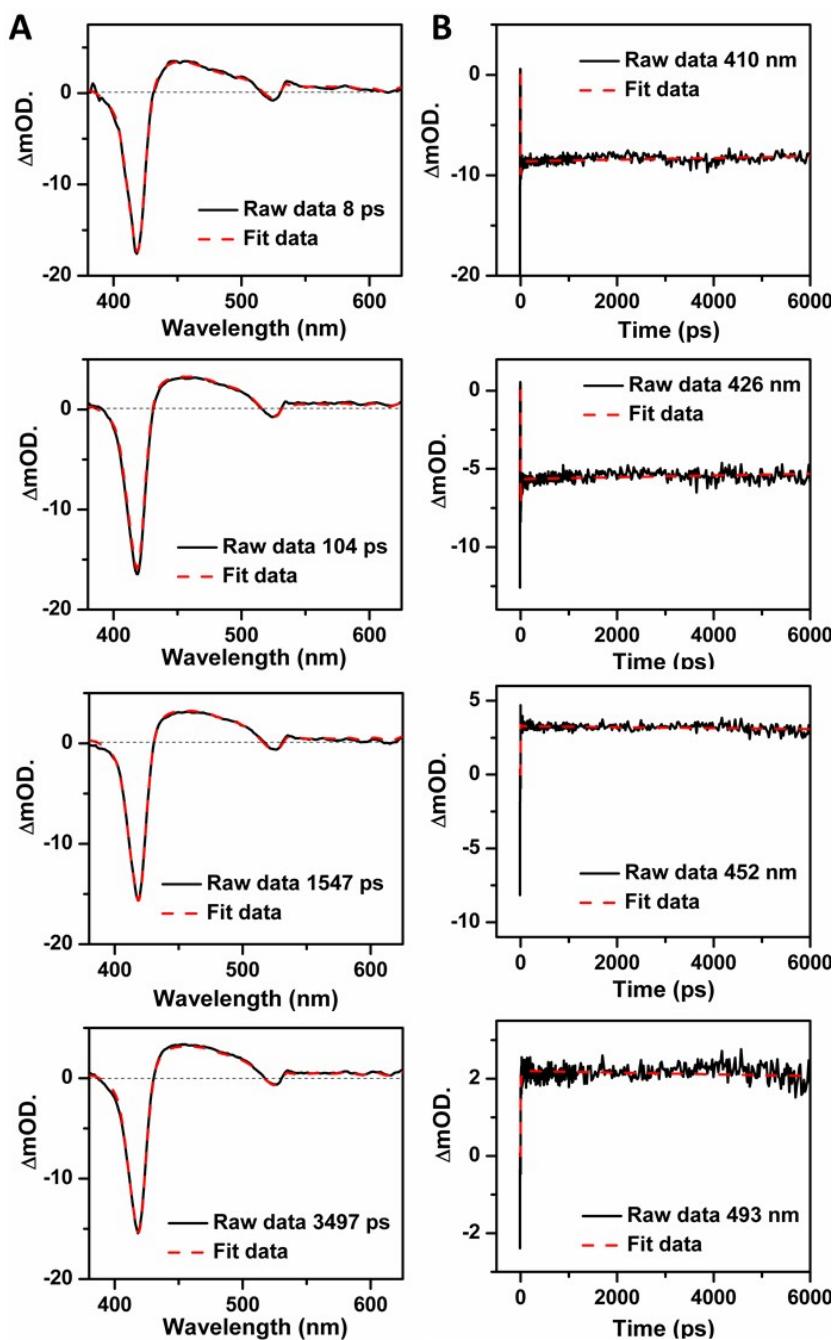

**Fig. S7.** Comparison of TA spectra(A) and single-wavelength dynamics(B) of PdPor-2-DPA between the raw data and the fitting data in  $S_1(\text{PdPor}^*\text{-DPA}) \rightarrow T_1(\text{PdPor}^*\text{-DPA})$  model obtained from the global analysis.

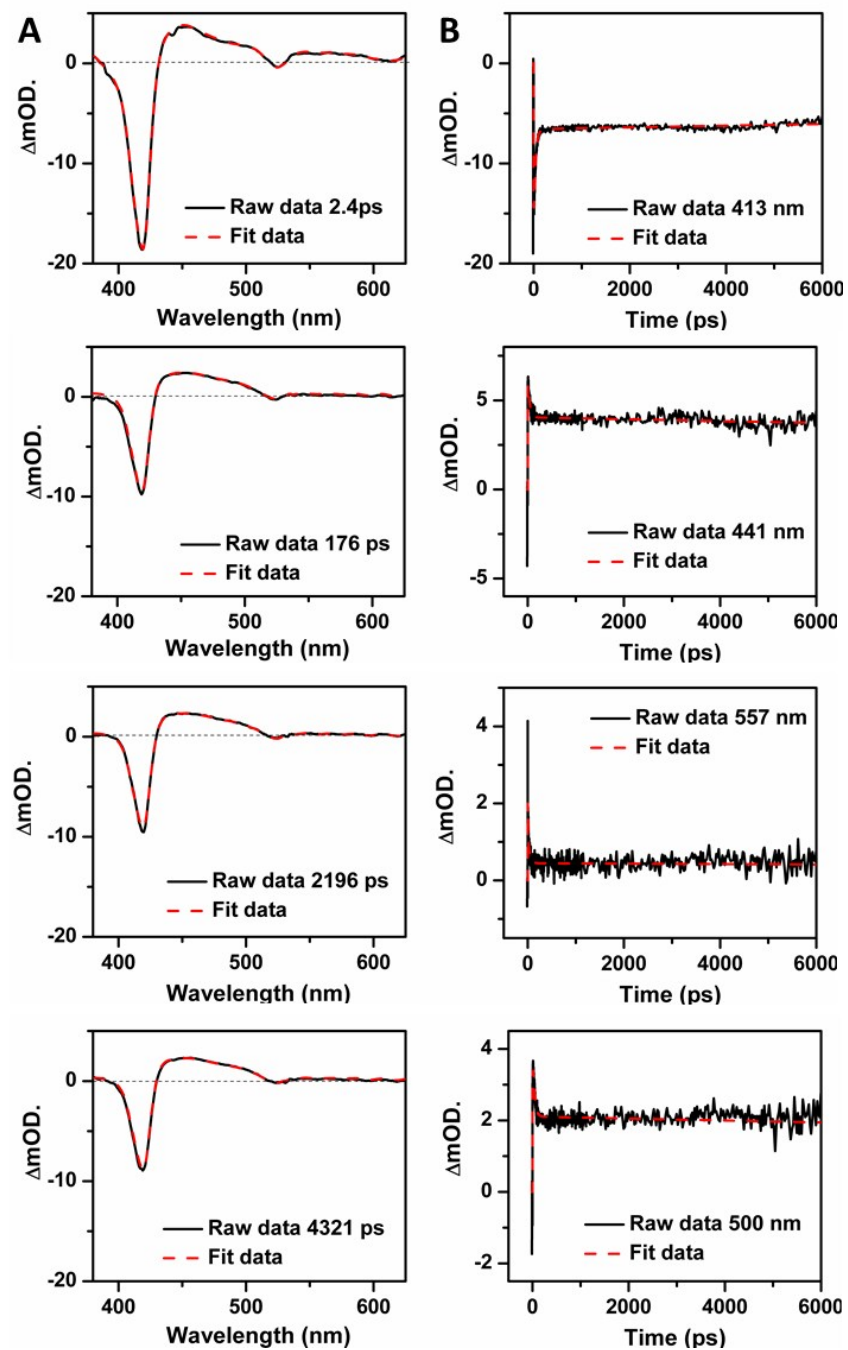

**Fig. S8.** Comparison of TA spectra (A) and single-wavelength dynamics (B) of PdPor-9-DPA between the raw data and the fitting data in  $(S_1(\text{PdPor}^*\text{-DPA}) \rightarrow T_1(\text{PdPor}^*\text{-DPA}) \rightarrow T_1(\text{PdPor}^*\text{-DPA}^*))$  model obtained from the global analysis.

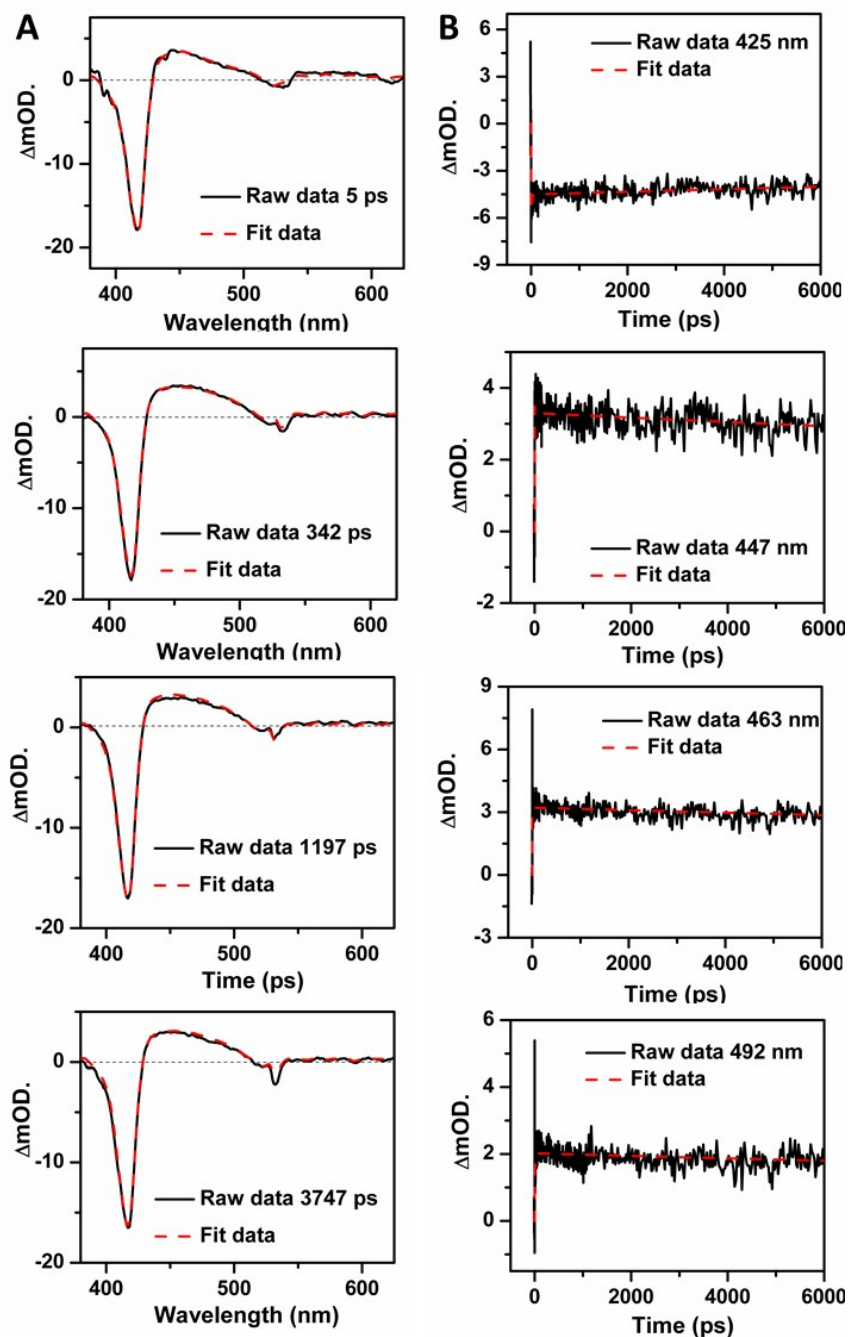

**Fig. S9.** Comparison of TA spectra(A) and single-wavelength dynamics(B) of PdTPP between the raw data and the fitting data in  $S_1(\text{PdPor}^*) \rightarrow T_1(\text{PdPor}^*)$  model obtained from the global analysis.



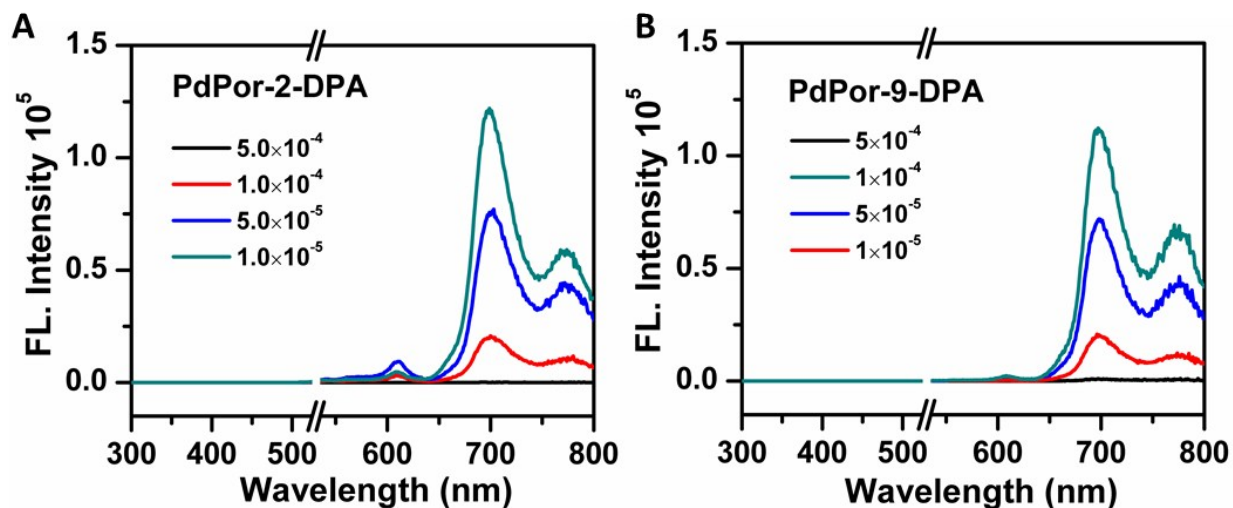

**Fig. S10.** Dependence of luminescence spectra on the concentration of PdPor-2-DPA (A) or PdPor-9-DPA (B) in deaerated toluene with 532 nm laser excitation (25 mW).

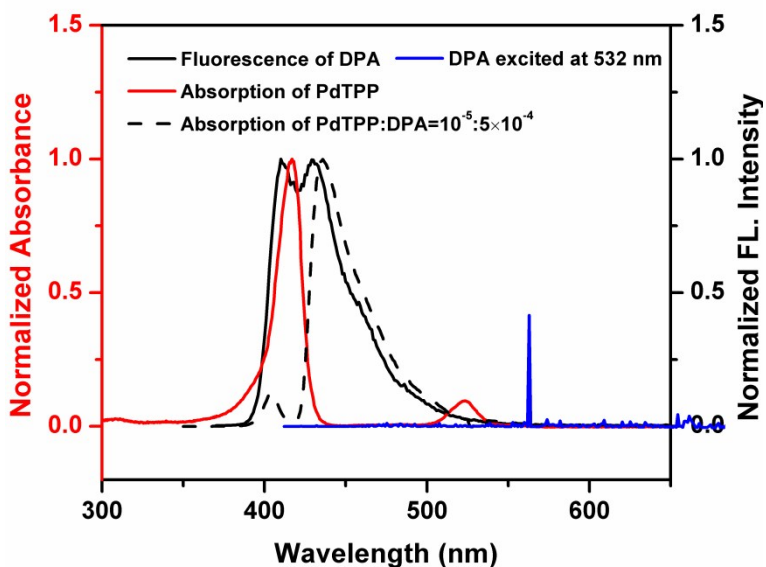

**Fig. S11.** Absorption spectrum of PdTPP; fluorescence emission spectrum of DPA; upconversion emission spectrum of PdTPP and DPA, in deaerated toluene.

**Table S1.** Phosphorescence quantum yields and lifetimes of these compounds at 293 K.

| Compounds          | $\Phi$ (%)      | $\tau^a$ ( $\mu\text{s}$ )                            | $\chi^2$ |
|--------------------|-----------------|-------------------------------------------------------|----------|
| <b>PdTPP-2-DPA</b> | $0.26 \pm 0.03$ | $108.98 \pm 0.1$ (91.33%)<br>$147.57 \pm 0.1$ (8.67%) | 1.027    |
| <b>PdTPP-9-DPA</b> | $0.23 \pm 0.03$ | $79.96 \pm 0.1$ (77.94%)<br>$119.23 \pm 0.1$ (22.06%) | 1.019    |
| <b>PdTPP</b>       | $0.41 \pm 0.05$ | $77.04 \pm 0.1$ (72.00%)<br>$215.33 \pm 0.1$ (28.00%) | 1.123    |

<sup>a</sup>Phosphorescence lifetimes were monitored at 697 nm ( $c = 1.0 \times 10^{-5}$  M).
